# Supplementary material for: Robustness of Distinctive Facial Features in Prader-Willi Syndrome: A Stereophotogrammetric Analysis and Association with Clinical and Biochemical Markers in Adult Individuals
Source: MDPI journal article supplement (doi:10.3390/biology11081148), 2022-07-30
Supplement: s1 [file s1]

**Table S1:** 3D anthropometric measurements describing the face in toto and its parts in subjects with PWS.

|                    | Anthropometric definition                             | Measurement                                | Unit |   | Males (N = 8) |      | Females (N = 7) |      |
|--------------------|-------------------------------------------------------|--------------------------------------------|------|---|---------------|------|-----------------|------|
|                    |                                                       |                                            |      |   | Mean          | SD   | Mean            | SD   |
| Facial widths      | Bifrontal diameter                                    | ft-ft                                      | mm   |   | 108.3         | 7.3  | 101.7           | 5.6  |
|                    | Upper facial width                                    | zy-zy                                      | mm   |   | 141.7         | 9.1  | 129.5           | 6.7  |
|                    | Cranial base width                                    | t-t                                        | mm   |   | 149.7         | 9.3  | 139.6           | 4.6  |
|                    | Lower facial width (mandibular width)                 | go-go                                      | mm   |   | 132.8         | 15.1 | 116.8           | 11.8 |
| Facial heights     | Upper facial height                                   | tr-n                                       | mm   |   | 58.4          | 7.9  | 56.0            | 8.3  |
|                    | Middle facial height                                  | n-sn                                       | mm   |   | 55.4          | 3.9  | 53.8            | 2.8  |
|                    | Lower facial height                                   | sn-pg                                      | mm   |   | 52.6          | 6.4  | 49.4            | 5.6  |
| Facial depths      | Upper facial depth                                    | t <sub>m</sub> -n                          | mm   |   | 97.6          | 4.3  | 91.5            | 4.6  |
|                    | Middle facial depth                                   | t <sub>m</sub> -sn                         | mm   |   | 102.9         | 3.2  | 94.4            | 5.4  |
|                    | Lower facial depth                                    | t <sub>m</sub> -pg                         | mm   |   | 119.6         | 6.8  | 109.0           | 3.9  |
| Facial convexities | Relative position of the exocanthia and nasion        | ex-n-ex                                    | deg  |   | 130.3         | 4.6  | 131.0           | 4.8  |
|                    | Upper facial convexity                                | t-n-t                                      | deg  |   | 74.9          | 4.0  | 74.7            | 3.7  |
|                    | Middle facial convexity                               | t-prn-t                                    | deg  |   | 64.4          | 3.1  | 65.7            | 3.2  |
|                    | Lower facial convexity                                | t-pg-t                                     | deg  |   | 64.1          | 2.6  | 65.3            | 1.5  |
| Facial divergence  | Facial divergence                                     | (t-n)/(pg-go)                              | deg  |   | 29.2          | 4.9  | 32.5            | 5.7  |
| Ratios             | Facial width/height                                   | (t-t)/(n-pg)                               |      |   | 141.1         | 14.0 | 137.5           | 8.8  |
|                    | Posterior/anterior facial height (FHI)                | (t <sub>m</sub> -go <sub>m</sub> )/(sn-pg) |      |   | 117.0         | 15.2 | 110.6           | 13.1 |
| Mandible           | Mandibular ramus length                               | t <sub>m</sub> -go <sub>m</sub>            | mm   |   | 61.0          | 6.9  | 54.1            | 4.3  |
|                    | Mandibular body length                                | pg-go <sub>m</sub>                         | mm   |   | 85.6          | 7.6  | 82.8            | 6.2  |
|                    | Gonial angle                                          | t-go-pg                                    | deg  | R | 109.7         | 4.0  | 110.7           | 6.0  |
|                    |                                                       |                                            |      | L | 109.3         | 5.1  | 107.5           | 7.2  |
| Eyes               | Biocular width                                        | ex-ex                                      | mm   |   | 90.2          | 6.2  | 83.3            | 4.2  |
|                    | Interocular width                                     | en-en                                      | mm   |   | 32.4          | 3.3  | 30.0            | 3.3  |
|                    | Palpebral fissure length                              | en-ex                                      | mm   | R | 29.6          | 2.1  | 27.4            | 1.3  |
|                    |                                                       |                                            |      | L | 29.5          | 2.8  | 27.2            | 1.3  |
|                    | Inclination of orbit versus the Frankfurt plane       | os-or-t                                    | deg  | R | 121.6         | 7.3  | 118.3           | 5.4  |
|                    |                                                       |                                            |      | L | 122.4         | 5.8  | 119.0           | 4.8  |
| Ears               | Auricle height                                        | sa-sba                                     | mm   | R | 65.3          | 4.7  | 58.9            | 3.2  |
|                    |                                                       |                                            |      | L | 67.1          | 5.3  | 60.4            | 3.1  |
|                    | Auricle width                                         | pra-pa                                     | mm   | R | 36.6          | 5.4  | 34.2            | 2.7  |
|                    |                                                       |                                            |      | L | 38.2          | 3.5  | 34.9            | 4.9  |
|                    | Inclination of the auricle versus the facial midplane | ear angle                                  | deg  | R | 22.3          | 10.0 | 20.3            | 6.5  |
|                    |                                                       |                                            |      | L | 21.1          | 10.8 | 19.1            | 4.3  |
| Mouth              | Mouth width                                           | ch-ch                                      | mm   |   | 52.7          | 5.1  | 49.3            | 5.2  |
|                    | Philtrum length                                       | sn-ls                                      | mm   |   | 16.3          | 2.2  | 15.6            | 3.3  |
|                    | Philtrum width                                        | cph-cph                                    | mm   |   | 11.5          | 2.0  | 10.3            | 1.5  |
|                    | Upper vermillion height                               | ls-sto                                     | mm   |   | 5.0           | 2.0  | 6.0             | 1.7  |
|                    | Lower vermillion height                               | li-sto                                     | mm   |   | 6.6           | 2.2  | 6.8             | 2.5  |
|                    | Mouth height/width                                    | (ls-li)/(ch-ch)                            |      |   | 20.8          | 6.7  | 23.7            | 5.8  |
| Nose               | Nasal height                                          | n-sn                                       | mm   |   | 55.4          | 3.9  | 53.8            | 2.8  |
|                    | Nasal width                                           | al-al                                      | mm   |   | 35.7          | 3.0  | 33.6            | 2.8  |
|                    | Nasal protrusion                                      | prn-sn                                     | mm   |   | 20.9          | 2.4  | 19.9            | 1.4  |
|                    | Nasal tip angle                                       | n-prn-sn                                   | deg  |   | 90.4          | 3.7  | 99.1            | 6.0  |

N, number of subjects; R, right side; L, left side; m, mid-landmark; SD, standard deviation.
