# Supplementary material for: Robustness of Distinctive Facial Features in Prader-Willi Syndrome: A Stereophotogrammetric Analysis and Association with Clinical and Biochemical Markers in Adult Individuals
Source: MDPI journal article supplement (doi:10.3390/biology11081148), 2022-07-30

**Figure S1:** Scatter plots with linear trend line showing the relationship between facial anthropometric measurements and biochemical /clinical parameters in individuals with PWS.

Significant associations ( $p < 0.05$ , uncorrected  $p$  values) are depicted.

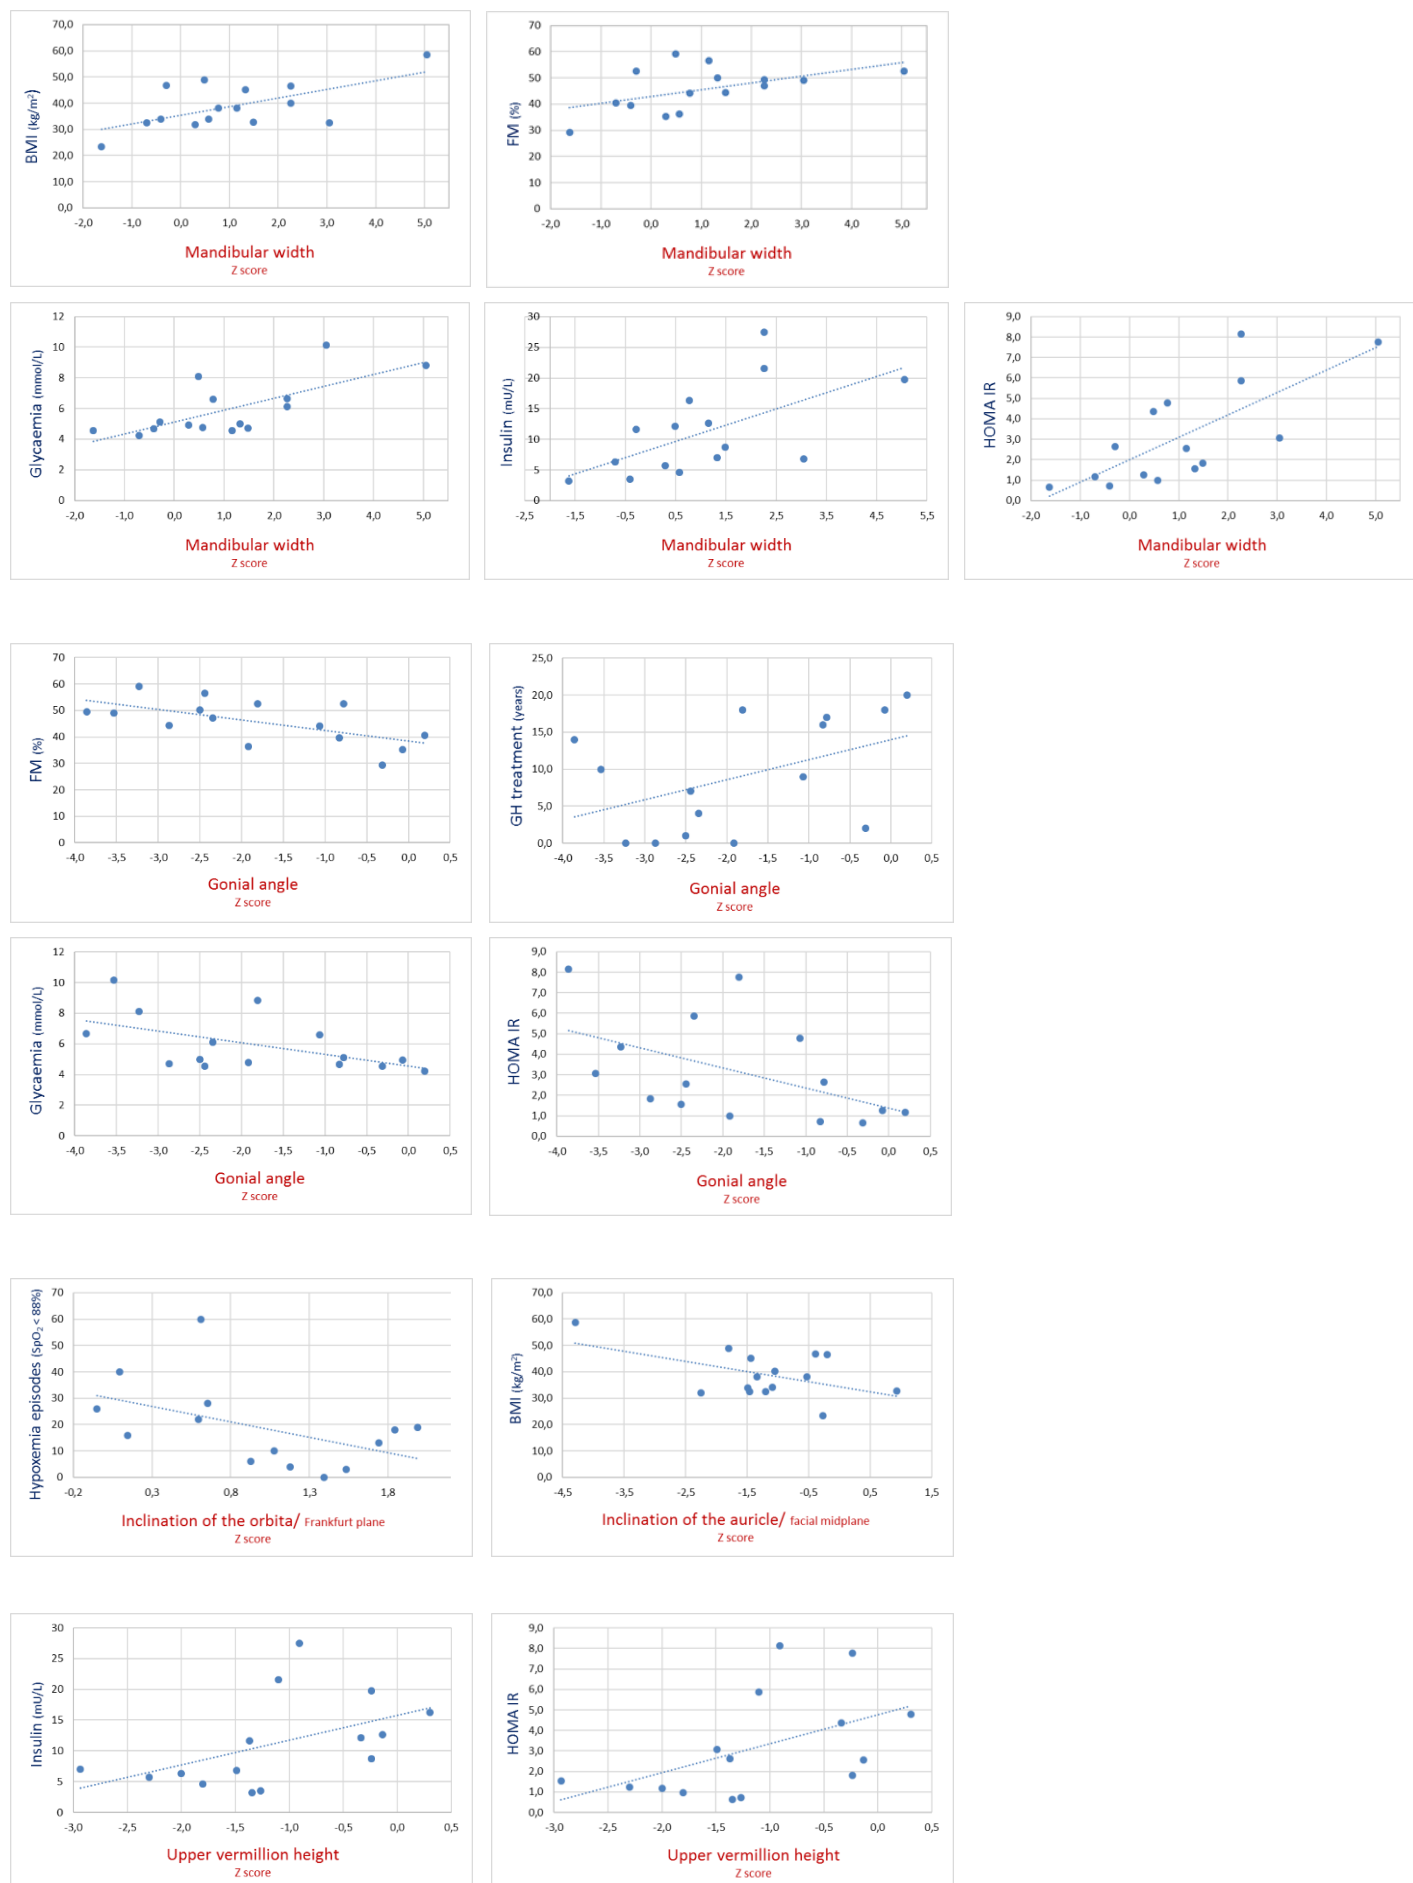

Supplement: s1 [file s1]
